# Supplementary material
Source: PubMed Central journal article supplement (PMC6662910)

# Supplemental Figure 1

Plasma concentrations of interleukin-6 detected by magnetic multiplex assay (R&D Systems) and high-sensitivity enzyme-linked immunosorbent assay (ELISA) for each of the 12 study participants (panels A-L) before and 90 and 210 minutes after the start of the Trier Social Stress Test (TSST).

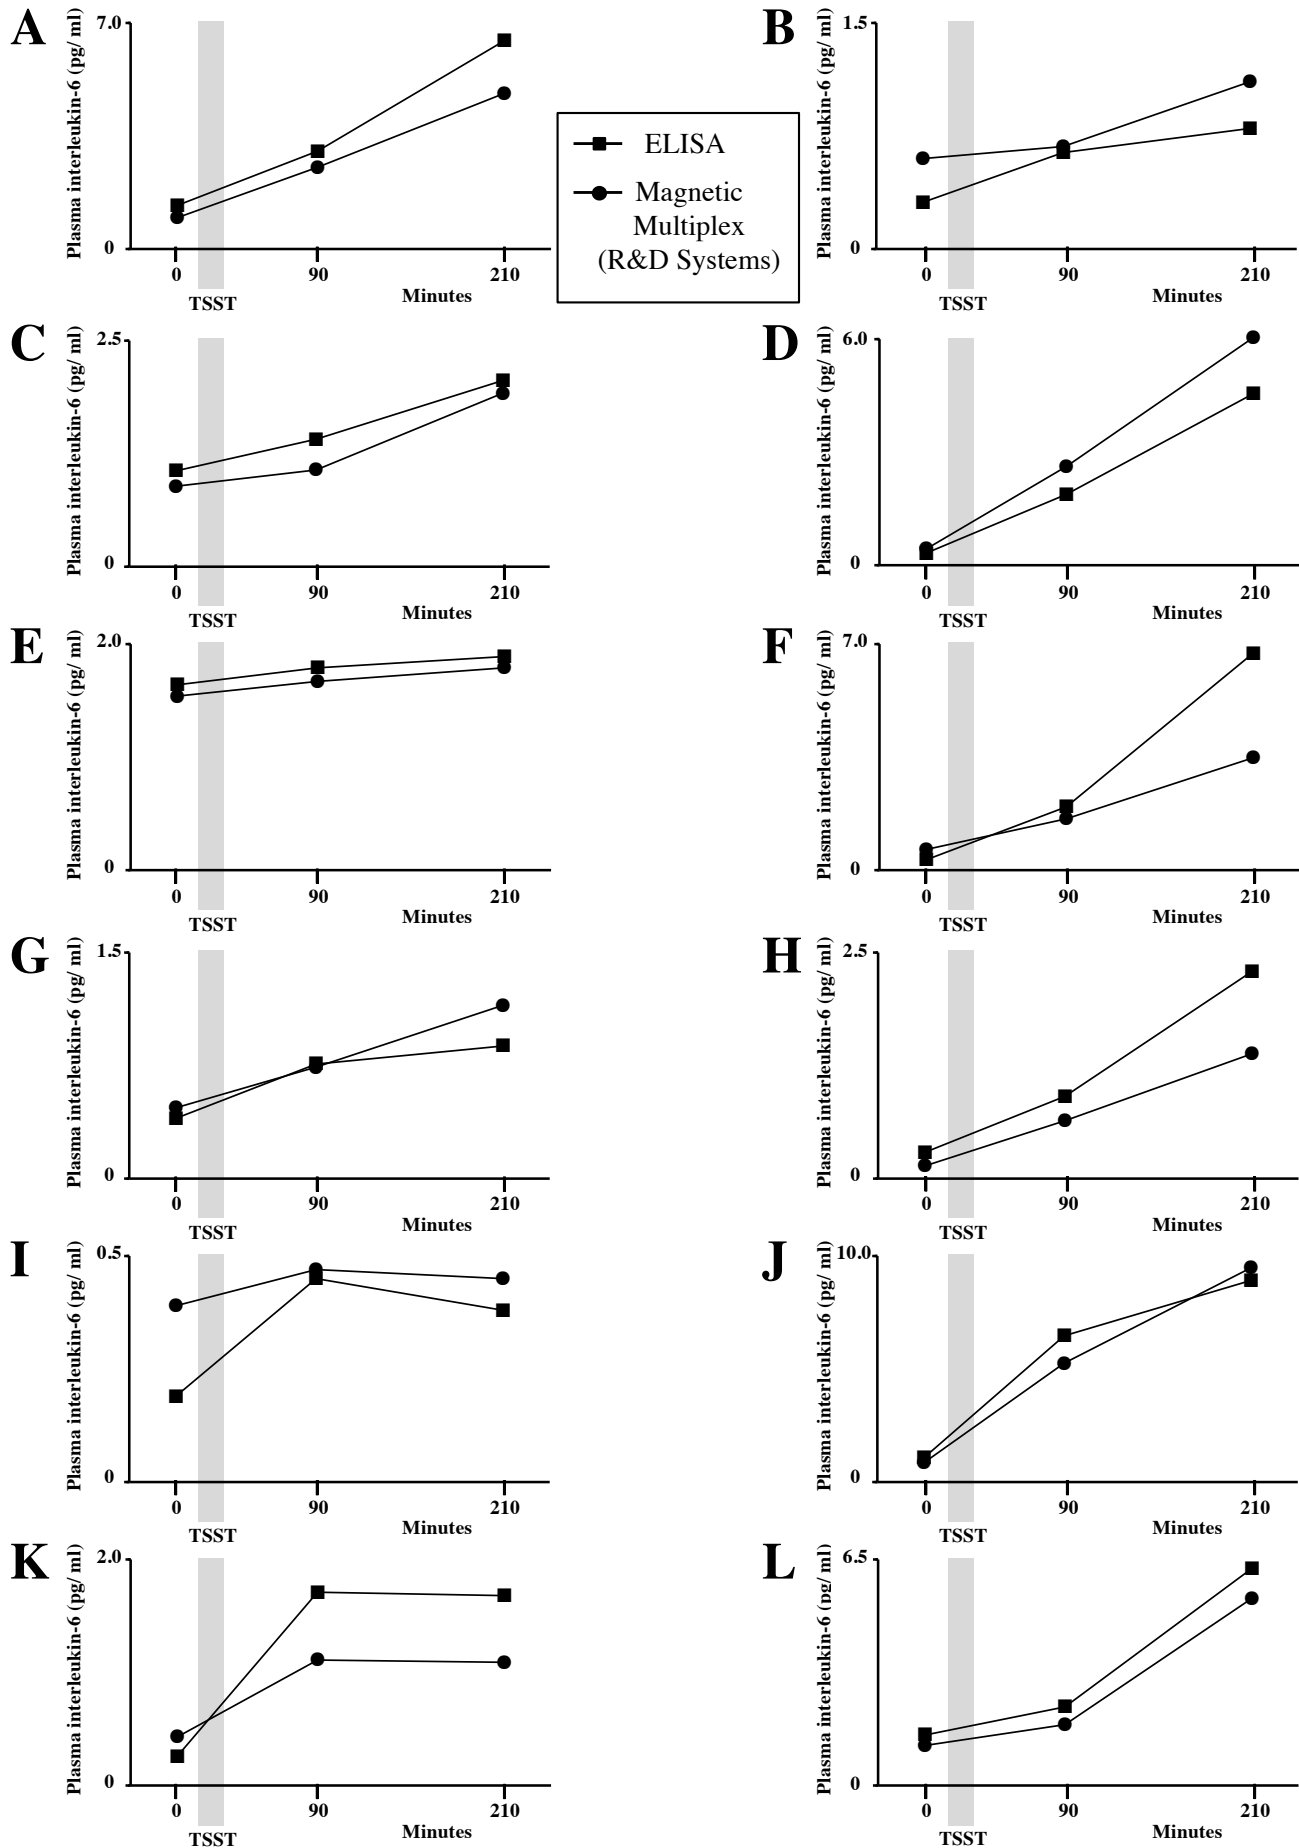

Supplement: NIHMS1501408-supplement-Supp1.pdf [file NIHMS1501408-supplement-Supp1.pdf]
