# Supplementary material
Source: PubMed Central journal article supplement (PMC6662910)

## Supplemental Figure 2

Plasma concentrations of interleukin-6 detected by magnetic bead panel multiplex assay (Millipore) and high-sensitivity enzyme-linked immunosorbent assay (ELISA) are negatively correlated ( $r = 0.41$ ,  $p = 0.03$ ) with one another.

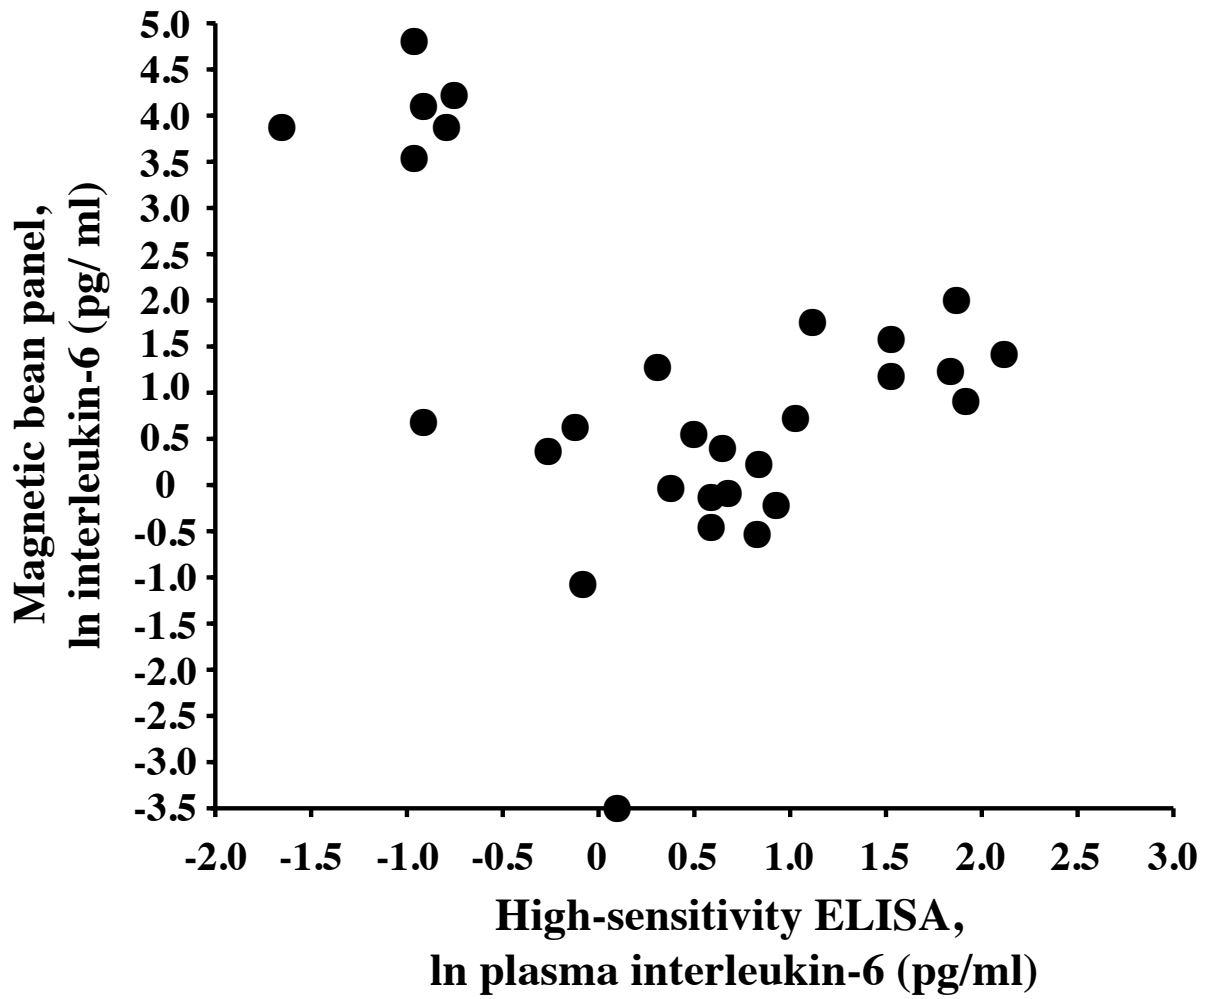

Supplement: NIHMS1501408-supplement-Supp2.pdf [file NIHMS1501408-supplement-Supp2.pdf]
