# Supplementary material
Source: PubMed Central journal article supplement (PMC6662910)

### Supplemental Figure 3

Concentrations of interleukin (IL)-6 were measured in plasma collected before, 90 minutes, and 210 minutes after the start of the Trier Social Stress Test (TSST) with magnetic bead panel multiplex assay (Millipore).

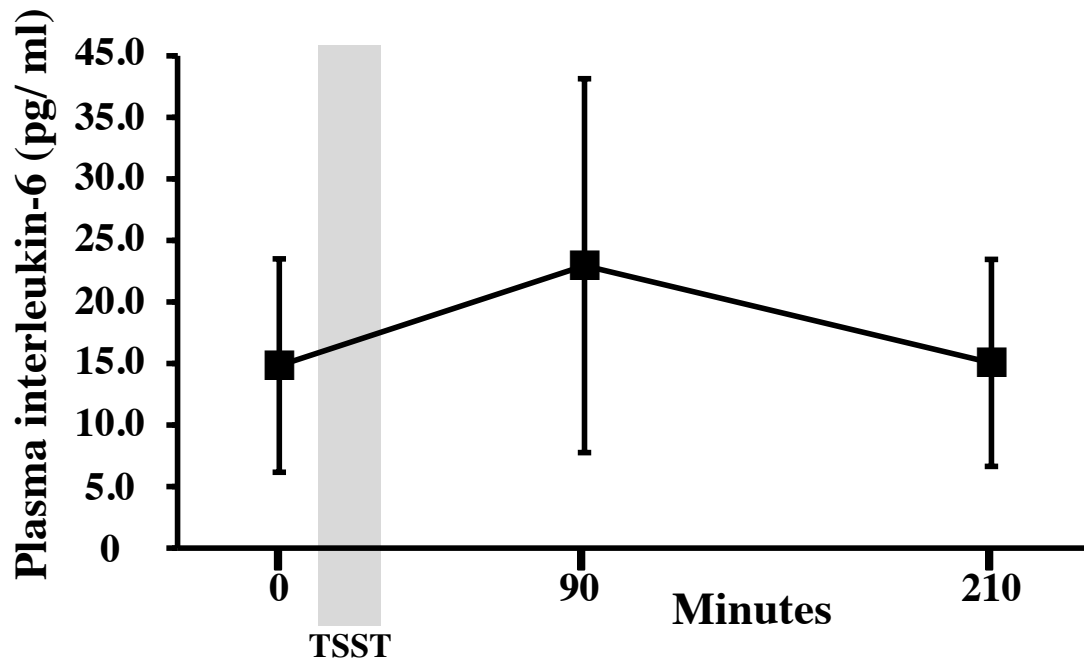

Supplement: NIHMS1501408-supplement-Supp3.pdf [file NIHMS1501408-supplement-Supp3.pdf]
