# Supplementary material
Source: PubMed Central journal article supplement (PMC6662910)

## Supplemental Figure 4

Plasma interleukin (IL)-6 responses to the TSST were determined by either high-sensitivity enzyme-linked immunosorbent assay (ELISA) or magnetic bead panel multiplex assay (Millipore) and aggregated as area under the curve from the baseline (initial) value ( $AUC_i$ ) are not significantly correlated with one another,  $r_s = 0.262$ ,  $p = ns$ .

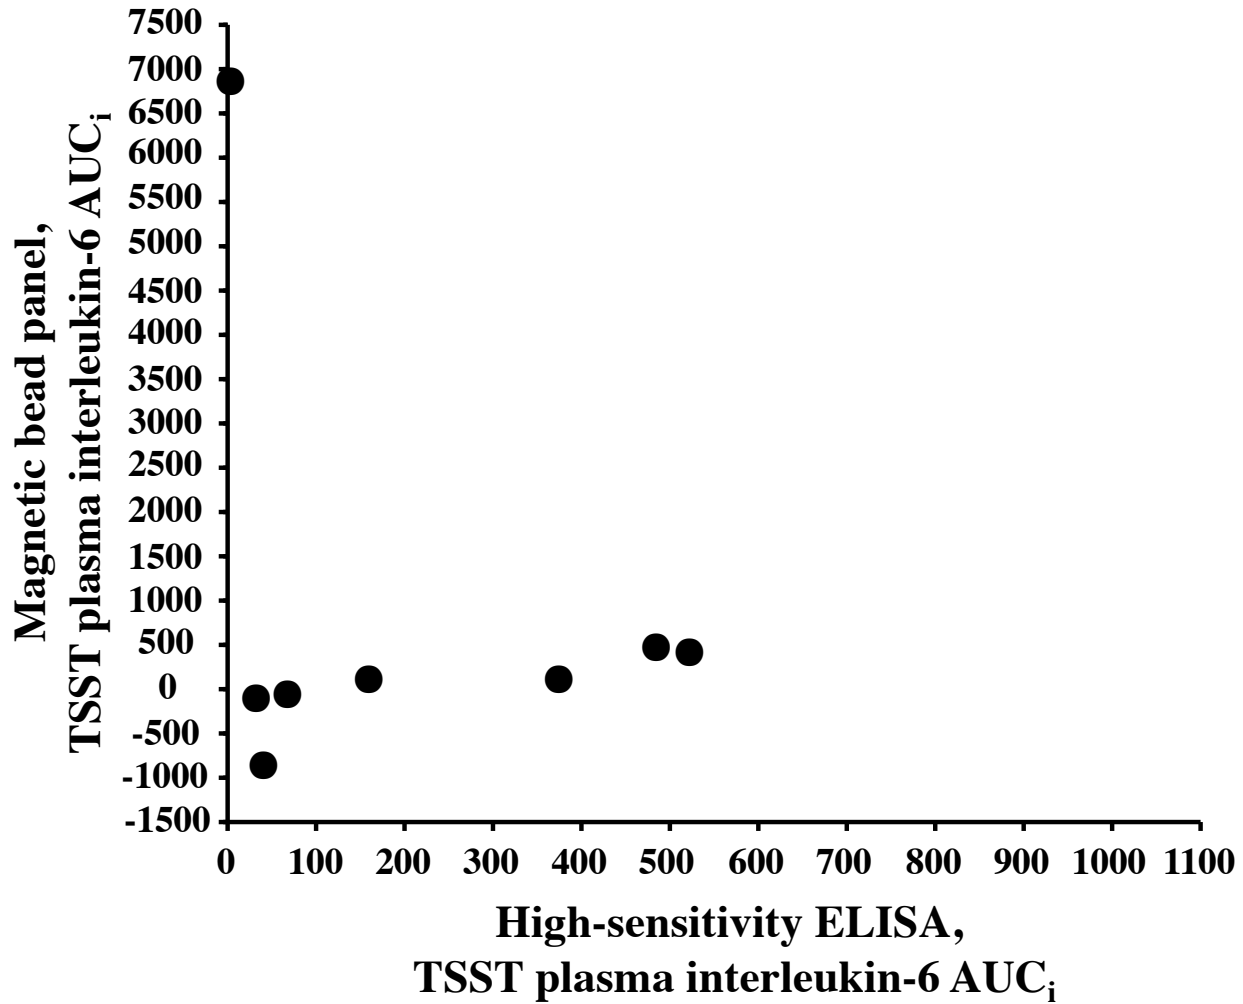

Supplement: NIHMS1501408-supplement-Supp4.pdf [file NIHMS1501408-supplement-Supp4.pdf]
